# Supplementary material for: Integrated Antitumor Activities of Cellular Immunotherapy with CIK Lymphocytes and Interferons against KIT/PDGFRA Wild Type GIST
Source: MDPI journal article supplement (doi:10.3390/ijms231810368), 2022-09-08
Supplement: s1 [file s1]

Fiorino E. et al.

**Integrated antitumor activities of cellular immunotherapy  
with CIK lymphocytes and interferons against KIT/PDGFRA  
wild type GIST.**

Supplementary Materials

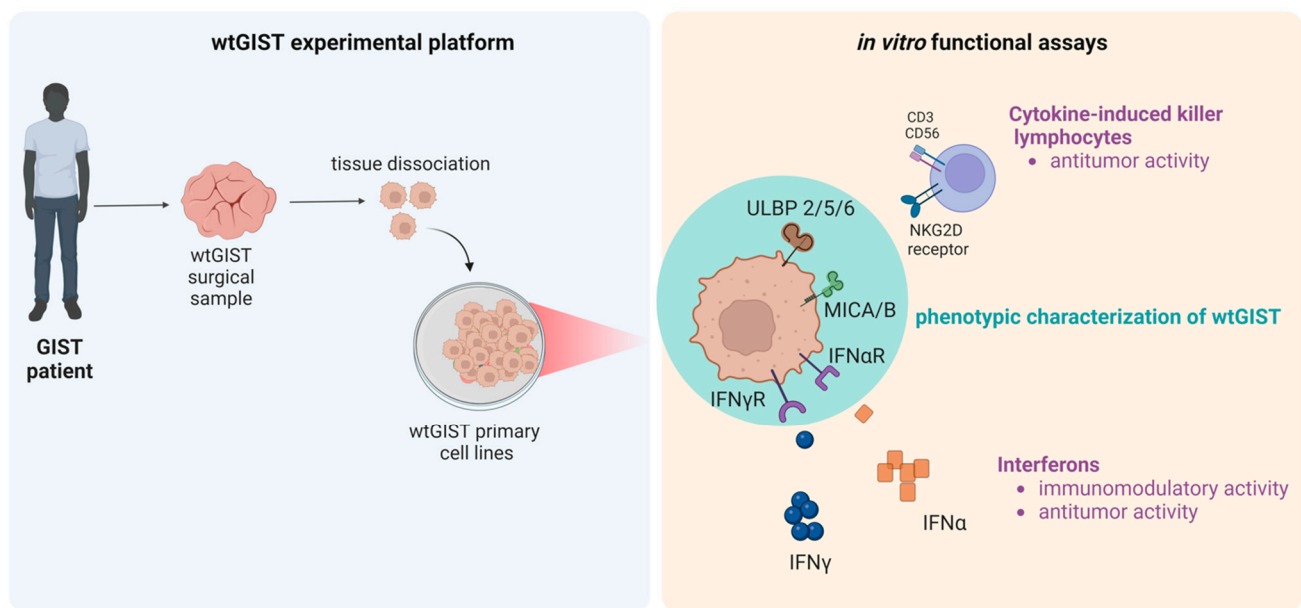

**Figure S1. Study schematic with experimental platform for patient-derived cells (left) and *in vitro* functional assays (right).** Created with BioRender.com.

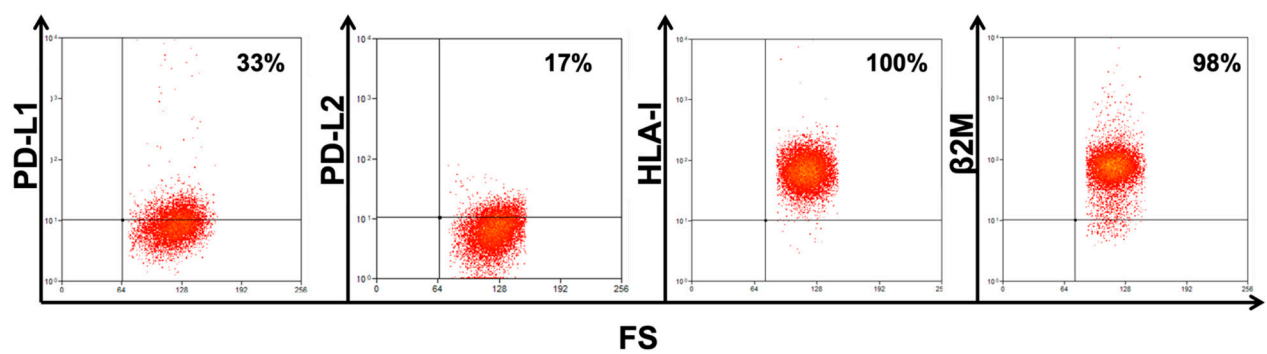

**Figure S2: exemplificative cytometry dot plots showing PD-L1, PD-L2, HLA-I/  $\beta$ 2M on wtGISTc.**

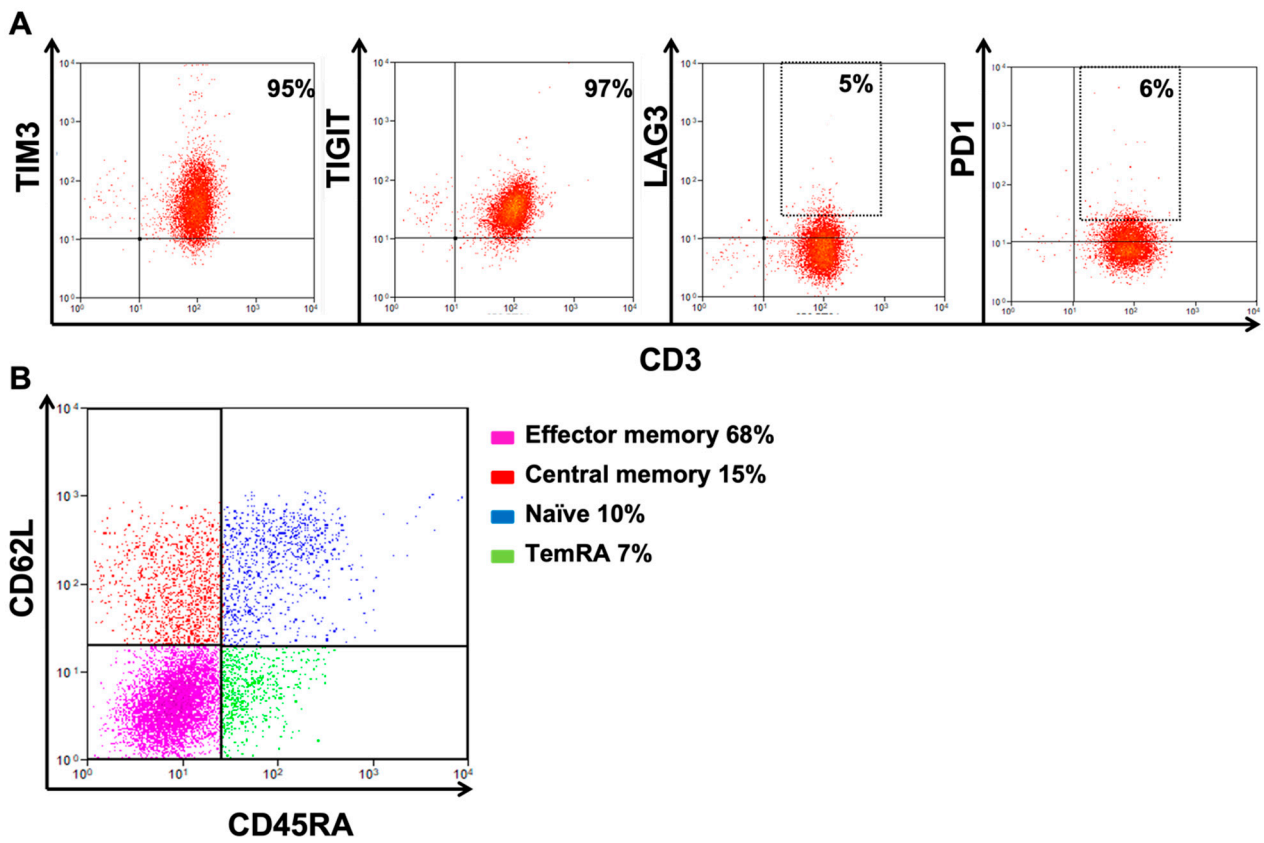

**Figure S3: exemplificative cytometry dot plots showing CIK phenotype and immune checkpoints expression.**
